# Supplementary material for: Obesity Risk Assessment for Spanish-Speaking Immigrant Families with Young Children in the United States: Reliability and Validity with Nutrient Values
Source: MDPI journal article supplement (doi:10.3390/children10050868), 2023-05-12
Supplement: s1 [file s1]

**Supplemental Table S1.** Behavioral domain and construct, item text, item visual content and means  $\pm$  SD for 18 items selected for final version of *Niños Sanos* assessment tool.

| Behavioral domain & construct | Item text                                                                                                | Item visual                                                                                                                                                              | Response Mean $\pm$ SD |
|-------------------------------|----------------------------------------------------------------------------------------------------------|--------------------------------------------------------------------------------------------------------------------------------------------------------------------------|------------------------|
| <b>VEGETABLES</b>             |                                                                                                          |                                                                                                                                                                          |                        |
| Vegetable availability        | Compro vegetales.<br>I buy vegetables.                                                                   |       | 4.2 $\pm$ 1.0          |
| Vegetable accessibility       | Tengo vegetales listos para que mi niño (a) se los coma.<br>I keep vegetables ready for my child to eat. |       | 3.2 $\pm$ 1.3          |
| <b>FRUIT</b>                  |                                                                                                          |                                                                                                                                                                          |                        |
| Fruit intake                  | Yo como frutas __ veces al día.<br>I eat fruit ____times a day.                                          |                                                                                      | 3.3 $\pm$ 0.9          |
| Fruit availability            | Compro frutas.<br>I buy fruit.                                                                           |   | 4.4 $\pm$ 0.8          |
| <b>BEANS</b>                  |                                                                                                          |                                                                                                                                                                          |                        |
| Dry cooked bean intake        | Mi niño (a) come frijoles __ veces por semana.<br>My child eats beans ____times a week.                  |   | 2.4 $\pm$ 1.0          |
| <b>MILK</b>                   |                                                                                                          |                                                                                                                                                                          |                        |

|                                    |                                                                                                                                                      |                                                                                                                                                                          |           |
|------------------------------------|------------------------------------------------------------------------------------------------------------------------------------------------------|--------------------------------------------------------------------------------------------------------------------------------------------------------------------------|-----------|
| Milk frequency                     | <p>Mi niño(a) toma leche __ veces al día.</p> <p>My child drinks milk __ times a <u>day</u>.</p>                                                     |       | 3.3 ± 0.8 |
| Milk frequency                     | <p>Yo tomo leche __ veces al día.</p> <p>I drink milk __ times a <u>day</u>.</p>                                                                     |       | 2.3 ± 0.8 |
| <b>WHOLE GRAINS</b>                |                                                                                                                                                      |                                                                                                                                                                          |           |
| Milk with cereal                   | <p>A mi niño(a) le gusta comer cereal en el desayuno.</p> <p>My child enjoys cereal for breakfast.</p>                                               |                                                                                        | 3.0 ± 1.2 |
| <b>SUGAR SWEETENED BEVERAGES</b>   |                                                                                                                                                      |                                                                                                                                                                          |           |
| Soda frequency                     | <p>Mi niño(a) toma sodas __ veces al día.</p> <p>My child drinks soda __ times a day.</p>                                                            |     | 4.7 ± 0.4 |
| Sports drinks, punch frequency     | <p>Mi niño(a) toma bebidas deportivas o endulzadas __ veces al día.</p> <p>My child drinks sport drinks or sugared drinks __ times a <u>day</u>.</p> |   | 4.5 ± 0.6 |
| <b>FAT/SATURATED FAT</b>           |                                                                                                                                                      |                                                                                                                                                                          |           |
| Energy density                     | <p>Mi niño(a) come comida rápida __ veces a la semana.</p> <p>My child eats fast food __ times a week.</p>                                           |                                                                                      | 4.4 ± 0.4 |
| Fat, energy density, saturated fat | <p>Le quito la grasa a la carne antes de comerla.</p> <p>I trim fat before eating.</p>                                                               |   | 4.3 ± 1.1 |
| <b>SNACK FOODS</b>                 |                                                                                                                                                      |                                                                                                                                                                          |           |

|                              |                                                                                                                                        |                                                                                      |           |
|------------------------------|----------------------------------------------------------------------------------------------------------------------------------------|--------------------------------------------------------------------------------------|-----------|
| Energy dense foods for snack | <p>Mi niño(a) come snacks como papitas (chips), galletas y dulces.</p> <p>My child eats snack foods like cookies, chips and candy.</p> |    | 4.0 ± 0.7 |
| <b>DINING OUT</b>            |                                                                                                                                        |                                                                                      |           |
| Energy density               | <p>Nosotros comemos fuera __ veces a la semana</p> <p>We eat out ____times a week.</p>                                                 |    | 4.1 ± 0.8 |
| <b>COOKING</b>               |                                                                                                                                        |                                                                                      |           |
| Energy density               | <p>Preparo las comidas para mi niño (a).</p> <p>I cook my child's dinner from scratch.</p>                                             |    | 4.6 ± 0.7 |
| <b>SCREEN TIME</b>           |                                                                                                                                        |                                                                                      |           |
| Television                   | <p>Mi niño(a) mira la televisión __ horas al día.</p> <p>My child watches TV __ hours a day.</p>                                       |   | 3.7 ± 0.6 |
| <b>PHYSICAL ACTIVITY</b>     |                                                                                                                                        |                                                                                      |           |
| Play, sedentary time         | <p>A mi niño(a) le gusta jugar en lugar de ver televisión.</p> <p>My child likes playing instead of watching TV.</p>                   |  | 3.4 ± 1.1 |
| <b>SLEEP</b>                 |                                                                                                                                        |                                                                                      |           |
| Bedtime                      | <p>Mi niño(a) se acuesta alrededor de las __ PM.</p> <p>My child goes to bed around __ P.M.</p>                                        |  | 3.0 ± 0.8 |

‡ Each item has a minimum of 1 and maximum of 5 points; responses as means ± standard deviations.
