# Supplementary material for: Obesity Risk Assessment for Spanish-Speaking Immigrant Families with Young Children in the United States: Reliability and Validity with Nutrient Values
Source: MDPI journal article supplement (doi:10.3390/children10050868), 2023-05-12
Supplement: s1 [file s1]

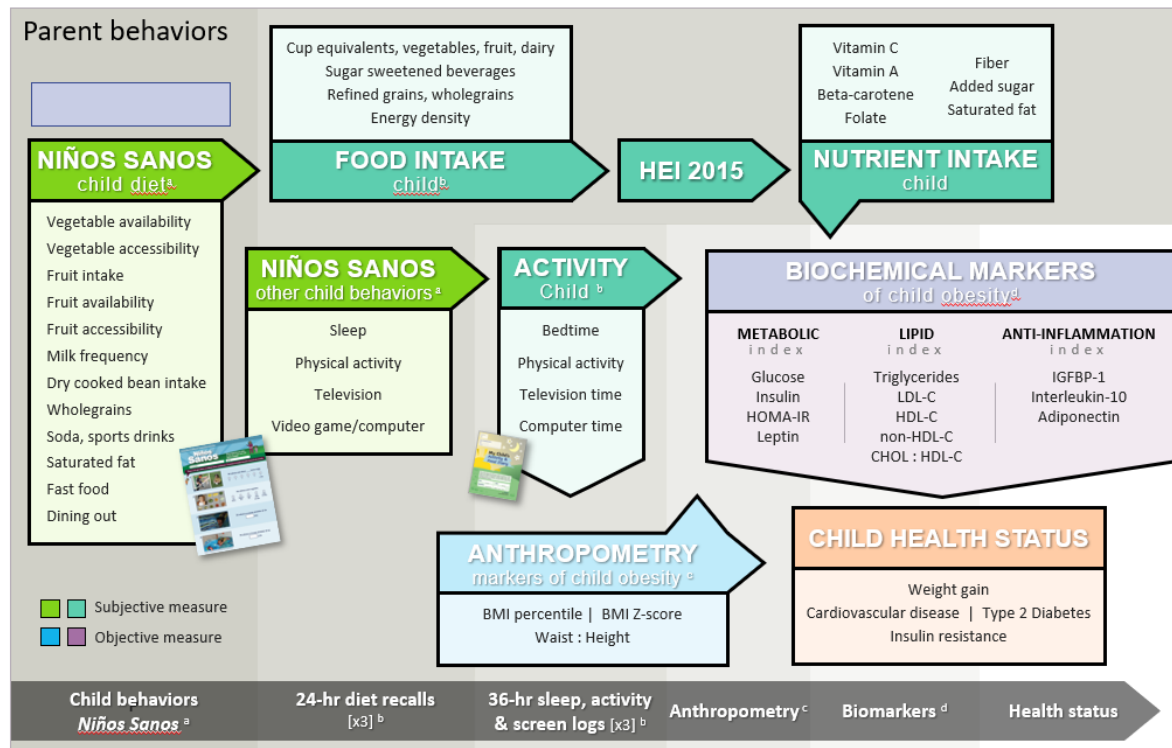

**Figure S1.** Biopsychosocial framework for validation of Niños Sanos targeting Hispanic families with preschool-aged children.

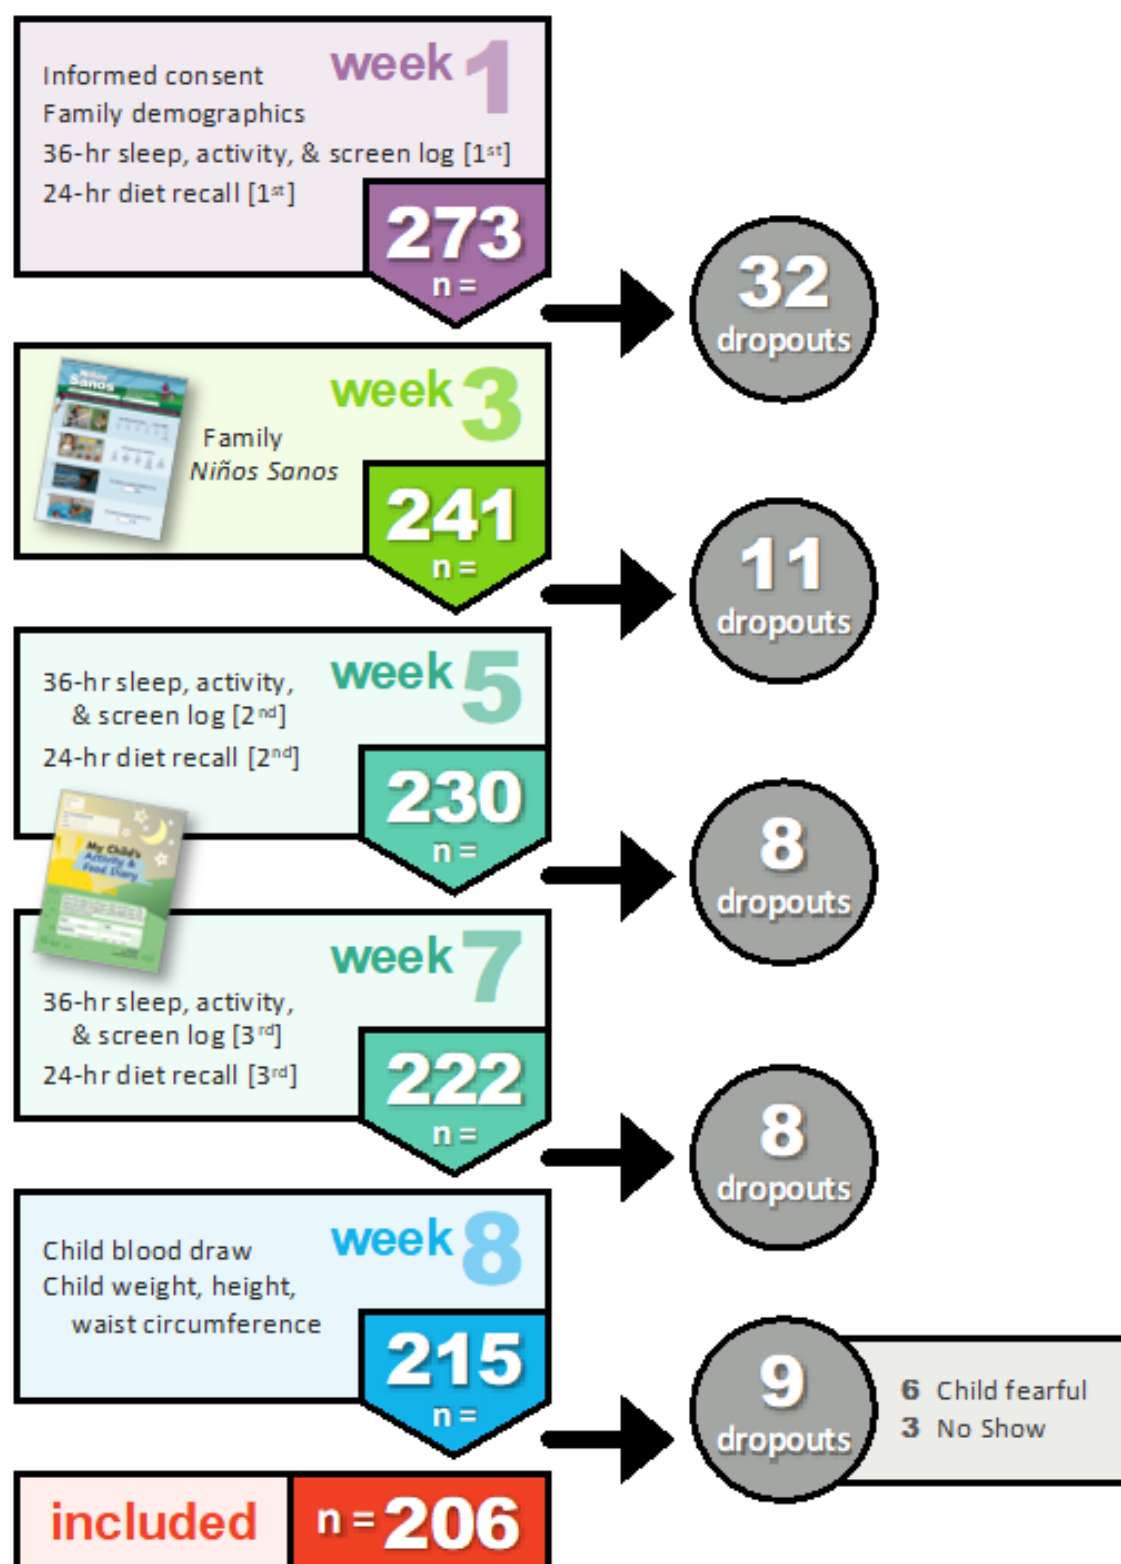

**Figure S2.** Flow diagram of initial recruits and subsequent dropouts of parent/child dyads at each stage of data collection for the Niños Sanos validation study.
